# Supplementary material
Source: PubMed Central journal article supplement (PMC7733556)
Supplement: mmc2.pdf [file mmc2.pdf]

## **PROTOCOLE DE RECHERCHE N'IMPLIQUANT PAS LA PERSONNE HUMAINE**

### **Infection à COVID-19 en réanimation. Étude COVID-ICU**

**Version n°2.3 du 25/05/2020**

**Acronyme : COVID – ICU**

**Porteur du projet (Responsable de la mise en œuvre) :**

**Matthieu SCHMIDT**

Hôpitaux Universitaire Pitié Salpêtrière  
Service de Médecine Intensive Réanimation  
Courriel : [matthieu.schmidt@aphp.fr](mailto:matthieu.schmidt@aphp.fr)

**Responsable scientifique :**

**Pr Alain MERCAT (Président du réseau REVA)**

CHU Angers  
Service de Réanimation médicale et hyperbare

**Méthodologiste :**

**Dr David HAJAGE**

Hôpitaux Universitaire Pitié Salpêtrière  
Unité de Recherche clinique  
Courriel : [david.hajage@aphp.fr](mailto:david.hajage@aphp.fr)

**Promoteur : Assistance Publique – Hôpitaux de Paris (Responsable du traitement)**

Et par délégation :

Direction de la Recherche Clinique et de l'Innovation (DRCI)

Hôpital Saint-Louis

1 avenue Claude Vellefaux - 75475 Paris cedex 10

Référent projet : Emmanuelle LIEGEY ([emmanuelle.liegey@aphp.fr](mailto:emmanuelle.liegey@aphp.fr))

**Structure chargée du suivi de la recherche :**

Unité de Recherche Clinique (URC) Pitié-Salpêtrière

Référent projet : Jessica PALMYRE ([jessica.palmyre@aphp.fr](mailto:jessica.palmyre@aphp.fr))

## **1. Rationnel**

En décembre 2019 sont apparus les premiers cas d'infection à coronavirus de type 2019-nCoV à Wuhan, dans la province de Hubei en Chine. Le virus s'est rapidement propagé à d'autres provinces chinoises puis à l'ensemble du globe. Les premiers cas en France ont été diagnostiqués le 23 janvier 2020 chez des patients ayant séjourné en Chine, puis le nombre de cas a rapidement augmenté pour atteindre 100 cas confirmés au 29 février 2020. A la date du 10 mars, plus de 1214 patients ont été testés positifs, 55 patients ont nécessité une hospitalisation en unités de soins intensifs ou en réanimation et 21 sont décédés. Il est très probable que l'épidémie prenne de l'ampleur dans les jours à venir aboutissant à un afflux de patients dont certains présenteront des défaillances d'organe nécessitant la prise en charge en réanimation et les unités de soins continus. En effet, l'expérience d'un hôpital de Wuhan rapportant 138 cas hospitalisés montre qu'environ 25% des patients nécessitent la prise en charge en réanimation et la moitié d'entre eux la ventilation mécanique invasive, voire l'oxygénation extracorporelle (ECMO) pour 35% des patients intubés. Dans une autre série de 52 patients sous ventilation mécanique en Réanimation en Chine, la mortalité était de 62%. Un rapport récent sur 1099 patients chinois montre que parmi les 173 patients atteints de forme sévère, le risque cumulé d'intubation ou de décès atteignait 21%. A la date du 6 mars plus de 100,000 cas ont été confirmés à travers le monde, dont plus de 3 300 patients sont décédés.

On estime que la pandémie grippale H<sub>1</sub>N<sub>1</sub> de 2009, il y a une décennie, a été responsable de plus de 200 000 décès de cause respiratoire. Au moment de la pandémie, un réseau de surveillance des cas hospitalisés en réanimation avait permis un suivi en temps réel de l'évolution spatio-temporelle des cas graves hospitalisés en réanimation en France. Un registre des cas nécessitant la ventilation mécanique avait été organisé par la SRLF et le réseau ReVA avec un recueil plus particulier pour les patients ayant été traités par ECMO. Ces travaux ont aussi permis de pointer le rôle délétère de la corticothérapie chez les patients atteints de SDRA, l'aide au diagnostic de la procalcitonine, et d'évaluer la qualité de vie et les séquelles respiratoires des patients survivants à 1 an.

Nous proposons, à travers le réseau REVA, de mettre en place une cohorte de surveillance des patients atteints de CoVid-19 admis en réanimation au sein d'un maximum de service dont les 70 réanimations du réseau dans le but de suivre en temps réel l'évolution de l'épidémie, de décrire les caractéristiques de cette population ayant une forme sévère, de décrire leur prise en charge, et leur pronostic à court terme

## **2. Objectifs de l'étude**

- 1) Collecter des informations démographiques, cliniques, bactériologiques, virologiques, et pronostiques détaillées des patients hospitalisés en réanimation
- 2) Décrire la fréquence d'utilisation des différents supports ventilatoires (oxygène, ventilation non-invasive, oxygénothérapie à haut débit, ventilation mécanique invasive, ECMO)
- 3) Décrire les facteurs associés à la mortalité hospitalière dans cette population sévère

## **3. Type d'étude**

Il s'agit d'une **étude n'impliquant pas la personne humaine, prospective et rétrospective, multicentrique** qui vise à impliquer un maximum de services de réanimation, dont les 70 réanimations membres du réseau de recherche REVA (qui soutient cette recherche).

#### **4. Méthodologie - Plan de l'étude**

Il s'agit d'une étude de cohorte, multicentrique, principalement rétrospective mais intégrant de façon prospective les cas incidents répondant aux critères d'inclusion. Chaque jour, les centres participants incluront et rentreront les données des patients testés positifs pour le SARS-CoV-19 avec un recueil informatique spécifique (CRF Cleanweb). Les données seront collectées quotidiennement jusqu'à la sortie de réanimation et on recueillera leur statut (vivant ou non) à la sortie de l'hôpital.

En raison du caractère évolutif de cette épidémie, la durée de l'étude n'est pas prévisible. L'étude débutera dès que les conditions réglementaires seront réunies et est prévue pour une durée **de 1 an**. Une prolongation de l'étude pourra être envisagée en cas de poursuite de l'épidémie.

#### **5. Nombre de sujets**

En raison de la nature épidémiologique de cette étude, définir un nombre de sujets n'est pas envisageable. Actuellement, 2406 inclusions.

#### **6. Critères de sélection :**

##### **a. Critères d'inclusion :**

1. Patients hospitalisés en réanimation pour une infection **confirmée** à COVID 19
2. Non opposition du patient ou de ses proches ou des titulaires de l'autorité parentales ou du représentant légal à la collection pseudonymisée de données cliniques

##### **b. Critère d'exclusion :**

1. Age <16 ans

#### **7. Données collectées**

**Il s'agit d'un recueil prospectif et rétrospectif de données de santé habituellement recueillies dans le cadre du soin. Il n'y aura aucune intervention spécifique liée à l'étude et aucune collection biologique.**

**Toutes ces données collectées seront pseudonymisées. Toutes données d'identité, telles que les initiales du patient ou la date de naissance ne seront pas collectées.**

Les données collectées dans l'eCRF seront les suivantes :

- 1) **À l'admission en réanimation** : Age, sexe, poids, taille, lieu de vie, comorbidités, immunodépression, score de sévérité, date du contage, date des premiers symptômes, date d'hospitalisation, type de symptômes, date prélèvement COVID-2019, co-infection bactérienne ou virale, NFS, créatinine, procalcitonine. Participation à d'autres études en lien avec le SARS-CoV-19 (afin de faire le lien entre les projets, éviter la redondance et simplifier au maximum la charge de travail des équipes de soins déjà sollicitées à l'extrême dans cette période épidémique exceptionnelle. Aucune extraction et utilisation des données sensibles et identifiantes de ces autres projets n'est prévu).

- 2) Données quotidiennes : Interface ventilatoire et ses caractéristiques (débit, FiO<sub>2</sub>, durée), paramètres de ventilation mécanique, thérapies ventilatoires adjuvantes (NO, DV, curares, manœuvre de recrutement ECMO), nombre de quadrants atteints sur la radio de thorax, score RASS, médicaments vasopresseurs et inotropes, antibiotique, traitement antiviral, corticoïde, curare, gaz du sang
- 3) Sortie de Réanimation : Date et statut (vivant/mort), mesures de limitation et arrêt de thérapeutique active, lieu de transfert, niveau de dépendance
- 4) Sortie de l'hôpital : Date et statut à la sortie de l'hôpital
- 5) Autres données :
  - Origine ethnique et Catégorie socio-professionnelle (CSP) : actuellement il n'existe aucune donnée européenne décrivant la population en réanimation de patient ayant un COVID 19. Les seules données existantes sont des données chinoises. Les caractéristiques de la population chinoise et de la population française diffèrent grandement en terme d'origine ethnique, de CSP, et de prévalence de l'obésité. Depuis 3 semaines que les médecins en réanimation font face à cette épidémie, il a été constaté que les patients de réanimation ont tous un profil clinique similaire. Obtenir ces données permettrait potentiellement d'identifier des populations plus à risque de formes graves
  - l'Identifiant Permanent Patient (IPP) sera recueilli uniquement pour les centres APHP afin de permettre l'utilisation du dossier médical informatisé de l'APHP (via l'EDS) pour récupérer certaines données nécessaires à la réalisation de cette étude en simplifiant au maximum la charge de travail des équipes de soins. L'accès à l'IPP sera restreint aux seuls membres de l'équipe de soin et au personnel en charge du dossier médical informatisé et de la consolidation des données de l'étude. L'IPP ne sera pas conservé après la dernière extraction des données de l'EDS.

### **Modalités de recueil**

Les données seront saisies par chaque investigateur participant ou personnel hospitalier en charge du remplissage (technicien d'étude clinique, externe, interne ...) dans un CRF électronique (Cleanweb) hébergé sur un serveur informatique sécurisé et géré par l'Assistance Publique Hôpitaux de Paris.

L'accès à l'IPP sera restreint aux seuls membres de l'équipe de soin et au personnel en charge du dossier médical informatisé et de la consolidation des données de l'étude.

## **8. Analyse statistique des données**

L'analyse statistique des données de la cohorte COVID-ICU sera effectuées au sein de l'URC Pitié-Salpêtrière sous la responsabilité du Dr David Hajage.

La durée des inclusions dépend de la durée de l'épidémie d'infection à SARS-CoV-2. Cette durée n'est pas connue au moment de la rédaction du projet de recherche. Par conséquent le nombre de patients qui sera inclus ne peut être déterminé à l'avance. Il est estimé à un maximum de 4000 patients, pour des raisons administratives. Cet effectif est largement suffisant pour identifier les facteurs pronostiques importants.

Les données continues seront présentées avec leur moyenne, médiane, écart-type et intervalle interquartile. Les données catégorielles seront présentées au moyen d'effectifs et de pourcentages. Les intervalles de confiance seront indiqués avec une couverture de 95%. Le pronostic des patients sera modélisée au moyen de modèles adaptés. En particulier des modèles adaptés aux données censurées seront réalisés, en tenant compte, le cas échéant, des

risques compétitifs. Des modèles linéaires généralisés à effets aléatoires seront utilisés pour l'analyse des données longitudinales répétées chez les patients, en fonction de la typologie des variables.

## **9. Risques et contraintes auxquels sont exposés les sujets se prêtant à la recherche**

Cette étude étant un recueil de données de santé habituellement recueillies dans le cadre du soin sans aucune intervention réalisée dans le cadre de la recherche, le **risque pour les patients inclus dans cette étude peut être considéré comme nul**.

Les bénéfices de cette étude sont multiples en termes de santé publique. Outre la description détaillée des patients présentant des formes sévères en France, cette étude permettra d'identifier les facteurs de risque de mortalité de cette population, l'impact sur le pronostic de l'utilisation de certains traitements (e.g corticoïdes) et de l'utilisation des différents supports ventilatoire. De plus, ces données seront également intéressantes pour l'estimation des ressources humaines et matérielles nécessaires en réanimation en cas de nouvelle épidémie.

## **10. Gestion des données**

**Il s'agit d'une étude purement observationnelle ne modifiant ni les pratiques diagnostiques, ni la prise en charge thérapeutique des patients.** À ce titre, cette étude s'inscrit dans le cadre d'un accord éthique « hors loi Jardé ». Les données seront colligées au sein d'un CRF électronique (CleanWeb) sécurisé et géré par l'unité de recherche clinique de la Pitié Salpêtrière (Pr Florence Tubach)

Chaque centre possédera un numéro de centre, et les patients inclus seront identifiés par un numéro. **Les données colligées qui seront analysées seront pseudonymisées. Le numéro IPP (pour les centres APHP) sera collecté dans un module non visible par le promoteur et ses représentants. Ces données identifiantes ne seront pas exportées et ne figureront pas dans la base de données servant à l'analyse de l'étude. Les données telles que les initiales du patient ou la date de naissance ne seront pas collectées.** Cette étude s'inscrit donc dans le respect de la vie privée et de la confidentialité des personnes se prêtant à la recherche.

L'IPP est recueilli sur l'eCRF CleanWeb. Il est enregistré en base de données sous une forme cryptée : il n'apparaît pas en clair à un administrateur de bases de données. L'algorithme utilisé pour le cryptage est le PBWITHMD5ANDES avec une clé de 64 bits dont seuls 56 sont effectivement utilisés. Le système de gestion de droits d'accès avec authentification de CLEANWEB, permet de contrôler parfaitement l'accès aux données personnelles des participants et de ne permettre cet accès qu'aux personnels pour lesquels cet accès est justifié et disposant d'une habilitation adéquate.

L'accès à l'IPP sera restreint aux seuls membres de l'équipe de soin et au personnel en charge du dossier médical informatisé et de la consolidation des données de l'étude. L'IPP ne sera pas conservé après la dernière extraction des données de l'EDS.

Le personnel en charge du chaînage des données avec d'autres cohortes pourra avoir un accès à l'IPP en clair. Ainsi, l'IPP lui sera visible sur l'eCRF. Il pourra exporter la base de données contenant le NIPP. Après chaînage, l'IPP sera supprimé de la base et transmise à la personne en charge de l'analyse.

## **11.Mode de financement**

Cette étude sera probablement financée par un PHRC national 2020. Une lettre d'intention vient d'être déposée à l'URC de la Pitié Salpêtrière au nom du réseau REVA en réponse à l'appel d'offre urgent **PHRC COVID-19**.

La création et la gestion de la base de données, ainsi que son analyse statistique s'inscriront dans le cadre de ce PHRC 2020 et seront, à ce titre, réalisées par **l'URC de la Pitié Salpêtrière, Paris**.

## **12.Résumé du protocole à l'usage des non-médecins membres de la commission d'éthique**

En décembre 2019 sont apparus les premiers cas d'infection à coronavirus de type 2019-nCoV à Wuhan, dans la province de Hubei en Chine. Le virus s'est rapidement propagé à d'autres provinces chinoises puis à l'ensemble du globe. Les premiers cas en France ont été diagnostiqués le 23 janvier 2020 chez des patients ayant séjourné en Chine, puis le nombre de cas a rapidement augmenté pour atteindre 100 cas confirmés au 29 février 2020. A la date du 10 mars, plus de 1214 patients ont été testés positifs, 55 patients ont nécessité l'hospitalisation en unités de soins intensifs ou en réanimation et 21 sont décédés. Il est très probable que l'épidémie prenne de l'ampleur dans les jours à venir aboutissant à un afflux de patients dont certains présenteront des défaillances d'organe nécessitant la prise en charge en réanimation ou en unité de soins continus. En effet, l'expérience d'un hôpital de Wuhan rapportant 138 cas hospitalisés montre qu'environ 25% des patients nécessitent la prise en charge en réanimation dont la moitié d'entre eux ont eu de la ventilation mécanique invasive. Dans une autre série de 52 patients sous ventilation mécanique en Réanimation en Chine, la mortalité était de 62%. A la date du 6 mars plus de 100,000 cas ont été confirmés à travers le monde, dont plus de 3 300 patients sont décédés.

On estime que la pandémie grippale H1N1 de 2009, il y a une décennie, a été responsable de plus de 200 000 décès de cause respiratoire. Au moment de la pandémie, un réseau de surveillance des cas hospitalisés en réanimation avait permis un suivi en temps réel de l'évolution spatio-temporelle des cas graves hospitalisés en réanimation en France. Un registre des cas nécessitant la ventilation mécanique avait été organisé par la SRLF et le réseau ReVA avec un recueil plus particulier pour les patients ayant une assistance ventilatoire appelée ECMO.

Nous proposons, à travers le réseau REVA, de mettre en place une cohorte de surveillance des patients atteints de CoVid-19 admis dans un maximum de service dont 70 réanimations du réseau dans le but de suivre en temps réel l'évolution de l'épidémie, de décrire les caractéristiques de cette population ayant une forme sévère, de décrire leur prise en charge, et leur pronostic à court terme.

## **13.Aspects éthiques et légaux**

### **a. Rôle du promoteur**

L'Assistance Publique - Hôpitaux de Paris est le promoteur de cette recherche et la DRCI en est son représentant.

### **b. Information des patients et/ou des proches.**

Dans le cadre de ce projet, les patients ou les proches ou les titulaires de l'autorité parentale seront informés par un investigateur et leur non-opposition sera recueillie oralement. Cette

information ainsi que l'obtention de la non-opposition à l'utilisation des données dans le cadre de l'étude COVID-ICU seront notifiées dans le dossier médical du patient.

4 types de note d'informations – non-opposition (NINO).

- NINO Patient : Concerne les patients en état de donner leur non-opposition.
- NINO Famille/Personne de confiance/Représentant légal : Pour les patients hors d'état de s'opposer au recueil de leurs données : la personne de confiance/parent/proche/représentant légal sera informée par l'investigateur à l'aide de la note d'information « personne de confiance/parent/proche/représentant légal » de l'étude COVID-ICU. Dès que le patient est apte à s'exprimer, l'investigateur informera le patient de l'étude à l'aide de la note d'information « patient poursuite » et recueillera sa non-opposition orale de poursuite à l'utilisation de ses données dans le cadre de l'étude. Cette information ainsi que l'obtention de la non-opposition de poursuite seront notifiées dans le dossier médical du patient.
- NINO Titulaire de l'autorité parentale : Pour les patients mineurs et s'adressent aux titulaires de l'autorité parentale. : les 2 titulaires de l'autorité parentale seront informés par l'investigateur à l'aide de la note d'information « titulaires de l'autorité parentale » de l'étude COVID-ICU. L'investigateur s'assurera de la non-opposition orale des 2 titulaires de l'autorité parentale à l'utilisation des données médicales de leur enfant dans le cadre du projet. Cette information ainsi que l'obtention de la non-opposition des 2 titulaires de l'autorité parentale seront notifiées dans le dossier médical du patient. En cas d'absence d'un des deux titulaires de l'autorité parentale, le mineur sera inclus après information d'un seul titulaire. Dès que possible, l'autre titulaire de l'autorité parentale sera informé et la note d'information lui sera transmise.
- NINO Poursuite : Pour les patients hors d'état ET dont les proches ont donné leur non-opposition.

Les mesures de sécurités et de confinements liées à l'épidémie interdisent à tout proche/personne de confiance/représentant légal/titulaires de l'autorité parentale ne permettent pas de donner l'information lors d'un entretien physique. Dans ces situations, le patient ou la personne de confiance/parent/proche sera(ont) informé(s) de l'étude via un contact téléphonique avec recueil de la non-opposition orale à l'utilisation des données médicales (la lettre d'information sera alors envoyée par courrier postal au domicile).

Situation particulière :

Cas particulier des personnes décédées avant l'inclusion dans la recherche. Dans ce cas, le(les) proche/personne de confiance/représentant légal/titulaires de l'autorité parentale sera(ont) informé(s) et la non-opposition à l'utilisation des données médicales sera recueillie. Compte-tenu de la situation critique et de la charge de travail très intense dans les services, le choix de revenir vers les personnes de confiance/parent/proche/représentant légal ou les deux titulaires de l'autorité sont laissés à l'appréciation des cliniciens.

Les données cliniques concernant les personnes décédées seront utilisées, sauf si l'intéressé a, de son vivant, exprimé son refus par écrit conformément à la réglementation en vigueur.

### **c. Démarches relatives à la réglementation informatique et liberté**

#### **Traitement des données en France**

Cette recherche n'entre pas dans le cadre de la « Méthodologie de Référence » (MR-004) de la CNIL car recueil de l'origine ethnique, de l'Identifiant Permanent Patient impossibilité d'informer les personnes.

Préalablement à la mise en œuvre du traitement des données nécessaires à la réalisation de la recherche, le promoteur devra obtenir l'avis du CERESS et l'autorisation de la CNIL via l'INDS.

#### **Responsabilités de l'investigateur vis-à-vis du promoteur**

L'investigateur coordonnateur ou la personne qualifiée s'engage à fournir au promoteur les informations relatives à l'état d'avancement de la recherche.

Toute modification du protocole et/ou de la note d'information de la recherche devra être soumise au promoteur.

L'Assistance Publique - Hôpitaux de Paris se réserve le droit d'interrompre la recherche à tout moment pour des raisons administratives.

#### **14.Déclaration de liens/conflits d'intérêt**

Il n'existe aucun lien ou conflit d'intérêt du réseau REVA avec le sujet et la conduite de cette étude observationnelle.
